# Supplementary material for: Prevalence and Antimicrobial Resistance of Staphylococcus aureus and Coagulase-Negative Staphylococcus/Mammaliicoccus from Retail Ground Meat: Identification of Broad Genetic Diversity in Fosfomycin Resistance Gene fosB
Source: MDPI journal article supplement (doi:10.3390/pathogens11040469), 2022-04-14
Supplement: s1 [file s1]

(a)

|                          |                                                                |    |
|--------------------------|----------------------------------------------------------------|----|
| S. saprophyticus-C57-1   | MIQSIHVITYSVSDISKSIIFYKDILKAKILVESDKTAYFTLGGWLWALNEEKDTPRNEI   | 60 |
| S. saprophyticus-C561    | MIQSIHVITYSVSDISKSIIFYKDILKAKILVESDKTAYFTLGGWLWALNEEKDTPRNEI   | 60 |
| S. saprophyticus-C58-1   | MIQSIHVITYSVSDISKSIIFYKDILKAKILVESDKTAYFTLGGWLWALNEEKDTPRNEI   | 60 |
| S. saprophyticus-C55-2   | MIQSIHVITYSVSDIKASITFYKDILKANILVESDKTAYFTVGGWLWALNEEKDIPRNEI   | 60 |
| S. saprophyticus-M25-2   | MIQSIHVITYSVSDIKASITFYKDILKANILVESDKTAYFTVGGWLWALNEEKDIPRNEI   | 60 |
| S. saprophyticus-C44-2   | MIQSIHVITYSVSDIKASITFYKDILKANILVESDKTAYFTVGGWLWALNEEKDIPRNEI   | 60 |
| S. saprophyticus-C60-1   | MIQTIHVITYSVSDIKASITFYKDILKANILVESDKTAYFTVGGWLWALNEEKDIPRNEI   | 60 |
| S. saprophyticus-C39-2   | MIQTIHVITYSVSDIKASITFYKDILKANILVESDKTAYFTVGGWLWALNEEKDIPRNEI   | 60 |
| S. saprophyticus-M11-1   | MIQTIHVITYSVSDIKASITFYKDILKANILVESDKTAYFTVGGWLWALNEEKDIPRNEI   | 60 |
| S. saprophyticus-P6-1    | MIQTIHVITYSVSDIKASITFYKDILKANILVESDKTAYFTVGGWLWALNEEKDIPRNEI   | 60 |
| S. saprophyticus-P18-2   | LIQSIHVITYSVSDINNSIAFYQDVLKAKVLVESDKTAYFTIGGLWALWALNEEKDISRNEI | 60 |
| S. saprophyticus-M17-3   | MIQSIHVITYSVSDIKTSIAFYQDILKAEILVESDKTVYFTLGGWLWALNEEKDIPRNEI   | 60 |
| S. saprophyticus-UTI-035 | MIQSIHVITYSVSDIKASITFYKDILKANILVESDKTAYFTVGGWLWALNEEKDIPRNEI   | 60 |
|                          | :***:***** ** *:***:*****:***:***** ****                       |    |

|                          |                                                               |     |
|--------------------------|---------------------------------------------------------------|-----|
| S. saprophyticus-C57-1   | QYSYTHMAFKIDSEFDEWYQWLKDNVNIILEGRSRDLRDKKSIYFTDPDGHKLELHTGT   | 120 |
| S. saprophyticus-C561    | QYSYTHMAFKIDSEFDEWYQWLKDNVNIILEGRSRDLRDKKSIYFTDPDGHKLELHTGT   | 120 |
| S. saprophyticus-C58-1   | QYSYTHMAFKIDSEFDEWYQWLKDNVNIILEGRSRDLRDKKSIYFTDPDGHKLELHTGT   | 120 |
| S. saprophyticus-C55-2   | AYSYTHMAFTIDSEFDEWYQWYKDNVNIILEGRNRDVRDKNSIYFTDPDVHKLELHTGT   | 120 |
| S. saprophyticus-M25-2   | AYSYTHMAFTIDSEFDEWYQWYKDNVNIILEGRNRDVRDKNSIYFTDPDVHKLELHTGT   | 120 |
| S. saprophyticus-C44-2   | AYSYTHMAFTIDSEFDEWYQWYKDNVNIILEGRNRDVRDKNSIYFTDPDVHKLELRTGT   | 120 |
| S. saprophyticus-C60-1   | AYSYTHMAFTIDSEFDEWYQWYKDNVNIILEGRNRDVRDKNSIYFTDPDVHKLELHTGT   | 120 |
| S. saprophyticus-C39-2   | AYSYTHMAFTIDSEFDEWYQWYKDNVNIILEGRNRDVRDKNSIYFTDPDVHKLELHTGT   | 120 |
| S. saprophyticus-M11-1   | AYSYTHMAFTIDSEFDEWYQWYKDNVNIILEGRNRDVRDKNSIYFTDPDVHKLELHTGT   | 120 |
| S. saprophyticus-P6-1    | AYSYTHMAFTIDSEFDEWYQWYKDNVNIILEGRNRDVRDKNSIYFTDPDVHKLELRTGT   | 120 |
| S. saprophyticus-P18-2   | QYSYTHMAFTINENEFDEWYQWLKDNVNIILEGRNRDIRDKQSIYFTDPDGHKFELHTGT  | 120 |
| S. saprophyticus-M17-3   | QYSYTHMAFTIDENEFEEWYQWLKDNVDNIILEGRNRDIRDKKSIYFTDPDGHKLELHTGT | 120 |
| S. saprophyticus-UTI-035 | AYSYTHMAFTIDSEFDEWYQWYKDNVNIILEGRNRDVRDKNSIYFTDPDVHKLELHTGT   | 120 |
|                          | *****:*.*:***:***** ** *****:***:***:***** ***:***:***        |     |

|                          |                     |     |
|--------------------------|---------------------|-----|
| S. saprophyticus-C57-1   | LQDRLDYYKEEKSHMKFYI | 139 |
| S. saprophyticus-C561    | LQDRLDYYKEEKSHMKFYI | 139 |
| S. saprophyticus-C58-1   | LQDRLDYYKEEKSHMKFYI | 139 |
| S. saprophyticus-C55-2   | LQDRLDYYKEEKPHMKFYI | 139 |
| S. saprophyticus-M25-2   | LQDRLDYYKEEKPHMKFYK | 139 |
| S. saprophyticus-C44-2   | LQDRLDYYKEEKPHMKFYK | 139 |
| S. saprophyticus-C60-1   | LQDRLDYYKEEKPHMKFYI | 139 |
| S. saprophyticus-C39-2   | LQDRLDYYKEEKPHMKFYK | 139 |
| S. saprophyticus-M11-1   | LQDRLDYYKEEKPHMKFYK | 139 |
| S. saprophyticus-P6-1    | LQDRLDYYKEEKPHMKFYK | 139 |
| S. saprophyticus-P18-2   | LQDRLDYYKEEKPHMKFYI | 139 |
| S. saprophyticus-M17-3   | LQDRLDYYKEEKPHMKFYI | 139 |
| S. saprophyticus-UTI-035 | LQDRLDYYKEEKPHMNFYK | 139 |
|                          | *****:***** **:     |     |

| No.                         | 1      | 2      | 3      | 4      | 5      | 6      | 7      | 8      | 9      | 10     | 11     | 12     | 13     |
|-----------------------------|--------|--------|--------|--------|--------|--------|--------|--------|--------|--------|--------|--------|--------|
| 1: S. saprophyticus-C57-1   | 100.00 | 100.00 | 100.00 | 89.21  | 87.77  | 88.49  | 87.77  | 88.49  | 87.77  | 87.77  | 87.05  | 86.33  | 88.49  |
| 2: S. saprophyticus-C561    | 100.00 | 100.00 | 100.00 | 89.21  | 87.77  | 88.49  | 87.77  | 88.49  | 87.77  | 87.77  | 87.05  | 86.33  | 88.49  |
| 3: S. saprophyticus-C58-1   | 100.00 | 100.00 | 100.00 | 89.21  | 87.77  | 88.49  | 87.77  | 88.49  | 87.77  | 87.77  | 87.05  | 86.33  | 88.49  |
| 4: S. saprophyticus-C55-2   | 89.21  | 89.21  | 89.21  | 100.00 | 98.56  | 99.28  | 98.56  | 99.28  | 98.56  | 98.56  | 97.84  | 87.05  | 88.49  |
| 5: S. saprophyticus-UTI-035 | 87.77  | 87.77  | 87.77  | 98.56  | 100.00 | 99.28  | 98.56  | 97.84  | 98.56  | 98.56  | 97.84  | 85.61  | 87.05  |
| 6: S. saprophyticus-M25-2   | 88.49  | 88.49  | 88.49  | 99.28  | 99.28  | 100.00 | 99.28  | 98.56  | 99.28  | 99.28  | 98.56  | 86.33  | 87.77  |
| 7: S. saprophyticus-C44-2   | 87.77  | 87.77  | 87.77  | 98.56  | 98.56  | 99.28  | 100.00 | 97.84  | 98.56  | 98.56  | 99.28  | 85.61  | 87.05  |
| 8: S. saprophyticus-C60-1   | 88.49  | 88.49  | 88.49  | 99.28  | 97.84  | 98.56  | 97.84  | 100.00 | 99.28  | 99.28  | 98.56  | 86.33  | 87.77  |
| 9: S. saprophyticus-C39-2   | 87.77  | 87.77  | 87.77  | 98.56  | 98.56  | 99.28  | 98.56  | 99.28  | 100.00 | 100.00 | 99.28  | 85.61  | 87.05  |
| 10: S. saprophyticus-M11-1  | 87.77  | 87.77  | 87.77  | 98.56  | 98.56  | 99.28  | 98.56  | 99.28  | 100.00 | 100.00 | 99.28  | 85.61  | 87.05  |
| 11: S. saprophyticus-P6-1   | 87.05  | 87.05  | 87.05  | 97.84  | 97.84  | 98.56  | 99.28  | 98.56  | 99.28  | 99.28  | 100.00 | 84.89  | 86.33  |
| 12: S. saprophyticus-P18-2  | 86.33  | 86.33  | 86.33  | 87.05  | 85.61  | 86.33  | 85.61  | 86.33  | 85.61  | 85.61  | 84.89  | 100.00 | 88.49  |
| 13: S. saprophyticus-M17-3  | 88.49  | 88.49  | 88.49  | 88.49  | 87.05  | 87.77  | 87.05  | 87.77  | 87.05  | 87.05  | 86.33  | 88.49  | 100.00 |

|                                                                   |                                                                    |    |
|-------------------------------------------------------------------|--------------------------------------------------------------------|----|
| S. warneri-C33-1                                                  | MIQAVNHVITYSVSDIKKSIEFYKNILKAKILLES DKTA YFTIGGLWLALNEESEIPRNEI    | 60 |
| S. lugdunensis-C47-3                                              | MIQSVNHVTYSVS DIKKSV E FYKNILKAKILLES DKTA YFTIGGLWLG LNEESEIPRNEI | 60 |
| S. pasteiri-C34-2                                                 | MIQAVNHVITYSVSDIKKSVEFYKNILKAKILLES DKTA YFTIGGLWLG LNEESEIPRNEI   | 60 |
| S. pasteiri-C65-1                                                 | MIQAVNHVITYSVSDIKKSVEFYKNILKAKILLES DKTA YFTIGGLWLG LNEESEIPRNEI   | 60 |
| S. warneri-C6                                                     | MIQAVNHVITYSVSDIKKSVEFYKNILKAKILLES DKTA YFTIGGLWLG LNEESEIPRNEI   | 60 |
| S. warneri-C46-1                                                  | MIQAVNHVITYSVSDIKKSVEFYKNILKAKILLES DKTA YFTIGGLWLG LNEESEIPRNEI   | 60 |
| S. warneri-C47-1                                                  | MIQAVNHVITYSVSDIKKSVEFYKNILKAKILLES DKTA YFTIGGLWLG LNEESEIPRNEI   | 60 |
| S. warneri-C49-1                                                  | MIQAVNHVITYSVSDIKKSVEFYKNILKAKILLES DKTA YFTIGGLWLG LNEESEIPRNEI   | 60 |
| S. warneri-C50-2                                                  | MIQAVNHVITYSVSDIKKSVEFYKNILKAKILLES DKTA YFTIGGLWLG LNEESEIPRNEI   | 60 |
| S. warneri-C51-2                                                  | MIQAVNHVITYSVSDIKKSVEFYKNILKAKILLES DKTA YFTIGGLWLG LNEESEIPRNEI   | 60 |
| S. warneri-C63                                                    | MIQAVNHVITYSVSDIKKSVEFYKNILKAKILLES DKTA YFTIGGLWLG LNEESEIPRNEI   | 60 |
| S. warneri-M21-3                                                  | MIQAVNHVITYSVSDIKKSVEFYKNILKAKILLES DKTA YFTIGGLWLG LNEESEIPRNEI   | 60 |
| S. warneri-DE0454                                                 | MIQAVNHVITYSVSDIKKSVEFYKNILKAKILLES DKTA YFTIGGLWLALNEESEIPRNEI    | 60 |
| ***: *****:*****:*****:*****:*****:*****:*****:*****:*****:*****: |                                                                    |    |

|                      |                                                             |     |
|----------------------|-------------------------------------------------------------|-----|
| S. warneri-C33-1     | HYSYTHMAFSIKENDFDEYDWLQKNHVNILEGRPRDVRDKKSIYFTDPDGHKLELHTGS | 120 |
| S. lugdunensis-C47-3 | HYSYTHMAFSIKENDFDEYDWLQKNHVNILEGRPRDVRDKKSIYFTDPDGHKLELHTGS | 120 |
| S. pasteiri-C34-2    | HYSYTHMAFSIKENDFDEYDWLQKNHVNILEGRPRDVRDKKSIYFTDPDGHKLELHTGS | 120 |
| S. pasteiri-C65-1    | HYSYTHMAFSIKENDFDEYDWLQKNHVNILEGRPRDVRDKKSIYFTDPDGHKLELHTGS | 120 |
| S. warneri-C6        | HYSYTHMAFSIKENDFDEYDWLQKNHVNILEGRPRDVRDKKSIYFTDPDGHKLELHTGS | 120 |
| S. warneri-C46-1     | HYSYTHMAFSIKENDFDEYDWLQKNHVNILEGRPRDVRDKKSIYFTDPDGHKLELHTGS | 120 |
| S. warneri-C47-1     | HYSYTHMAFSIKENDFDEYDWLQKNHVNILEGRPRDVRDKKSIYFTDPDGHKLELHTGS | 120 |
| S. warneri-C49-1     | HYSYTHMAFSIKENDFDEYDWLQKNHVNILEGRPRDVRDKKSIYFTDPDGHKLELHTGS | 120 |
| S. warneri-C50-2     | HYSYTHMAFSIKENDFDEYDWLQKNHVNILEGRPRDVRDKKSIYFTDPDGHKLELHTGS | 120 |
| S. warneri-C51-2     | HYSYTHMAFSIKENDFDEYDWLQKNHVNILEGRPRDVRDKKSIYFTDPDGHKLELHTGS | 120 |
| S. warneri-C63       | HYSYTHMAFSIKENDFDEYDWLQKNHVNILEGRPRDVRDKKSIYFTDPDGHKLELHTGS | 120 |
| S. warneri-M21-3     | HYSYTHMAFSIKENDFDEYDWLQKNHVNILEGRPRDVRDKKSIYFTDPDGHKLELHTGS | 120 |
| S. warneri-DE0454    | HYSYTHMAFSIKENDFDEYDWLQKNHVNILEGRPRDVRDKKSIYFTDPDGHKLELHTGC | 120 |
| *****                |                                                             |     |

|                      |                    |     |
|----------------------|--------------------|-----|
| S. warneri-C33-1     | LQDRMNYKDEKSHIKFYE | 139 |
| S. lugdunensis-C47-3 | LQDRMNYKDEKPHIKFNE | 139 |
| S. pasteiri-C34-2    | LQDRMNYKDEKPHIKFYE | 139 |
| S. pasteiri-C65-1    | LQDRMNYKDEKPHIKFYE | 139 |
| S. warneri-C6        | LQDRMNYKDEKPHIKFYE | 139 |
| S. warneri-C46-1     | LQDRMNYKDEKPHIKFYE | 139 |
| S. warneri-C47-1     | LQDRMNYKDEKPHIKFYE | 139 |
| S. warneri-C49-1     | LQDRMNYKDEKPHIKFYE | 139 |
| S. warneri-C50-2     | LQDRMNYKDEKPHIKFYE | 139 |
| S. warneri-C51-2     | LQDRMNYKDEKPHIKFYE | 139 |
| S. warneri-C63       | LQDRMNYKDEKPHIKFYE | 139 |
| S. warneri-M21-3     | LQDRMNYKDEKPHIKFYE | 139 |
| S. warneri-DE0454    | LQDRMNYKDEKPHIKFYE | 139 |
| ***** **             |                    |     |

[illegible]

(c)

```
S. capitis-C1      MNIQGINHICFSVSNLVESIKFYRDVLKGELLVSGKTTAYFDIGGLWVALNEEVNVPRT 60
S. capitis-C46-2  MNIQGINHICFSVSNLVESIKFYRDVLKGELLVSGKTTAYFDIGGLWVALNEEVNVPRT 60
S. capitis-C47-2  MNIQGINHICFSVSNLVESIKFYRDVLKGELLVSGKTTAYFDIGGLWVALNEEVNVPRT 60
S. capitis-C55-4  MNIQGINHICFSVSNLVESIKFYRDVLKGELLVSGKTTAYFDIGGLWVALNEEVNVPRT 60
S. capitis-C2     MDIQGFNHICFSVSNLVESIKFYRDVLKGELLVSGKTTAYFDIGGLWVALNEEVNVPRT 60
S. capitis-BN2    MNIQGINHICFSVSNLVESIKFYRDVLKGELLVSGKTTAYFDIGGLWVALNEEVNVPRT 60
                  *:***:*****

S. capitis-C1      IKYSYTHIAFSINENEFEEWYKWLQKHNVNILEGRKRSHQDKKSIYFTDPDGHKLELHTG 120
S. capitis-C46-2  IKYSYTHIAFSINENEFEEWYKWLQKHNVNILEGRKRSHQDKKSIYFTDPDGHKLELHTG 120
S. capitis-C47-2  IKYSYTHIAFSINENEFEEWYKWLQKHNVNILEGRKRSHQDKKSIYFTDPDGHKLELHTG 120
S. capitis-C55-4  IKYSYTHIAFSINENEFEEWYKWLQKHNVNILEGRKRSHQDKKSIYFTDPDGHKLELHTG 120
S. capitis-C2     IKYSYTHIAFSINENEFEEWYKWLQKHNVNILEGRKRSHQDKKSIYFTDPDGHKLELHTG 120
S. capitis-BN2    IKYSYTHIAFSINENEFEEWYKWLQKHNVNILEGRKRSHQDKKSIYFTDPDGHKLELHTG 120
                  *****:*****

S. capitis-C1      TLNDRLDYKKKEKTHMTFY 140
S. capitis-C46-2  TLNDRLDYKKKEKTHMTFY 140
S. capitis-C47-2  TLNDRLDYKKKEKTHMTFY 140
S. capitis-C55-4  TLNDRLDYKKKEKTHMTFY 140
S. capitis-C2     TLNDRLDYKKKEKTHMTFY 140
S. capitis-BN2    TLNDRLDYKKKEKTHMTFY 140
                  *****
```

| No.                 | 1      | 2      | 3      | 4      | 5      | 6      |
|---------------------|--------|--------|--------|--------|--------|--------|
| 1: S. capitis-BN2   | 100.00 | 100.00 | 100.00 | 100.00 | 100.00 | 97.86  |
| 2: S. capitis-C1    | 100.00 | 100.00 | 100.00 | 100.00 | 100.00 | 97.86  |
| 3: S. capitis-C46-2 | 100.00 | 100.00 | 100.00 | 100.00 | 100.00 | 97.86  |
| 4: S. capitis-C47-2 | 100.00 | 100.00 | 100.00 | 100.00 | 100.00 | 97.86  |
| 5: S. capitis-C55-4 | 100.00 | 100.00 | 100.00 | 100.00 | 100.00 | 97.86  |
| 6: S. capitis-C2    | 97.86  | 97.86  | 97.86  | 97.86  | 97.86  | 100.00 |

**Supplementary Figure S2** Alignment of FosB amino acid sequences analyzed in this study and their identities in clusters of *S. saprophyticus* (a), *S. warneri* (b), and *S. capitis* (c). Reference sequences were added in each analysis: *S. saprophyticus* strain UTI-035, *S. warneri* strain DE0454, and *S. capitis* strain BN2 (GenBank accession nos. CP054434, VDRS01000003, and CP042341, respectively). Asterisk (\*) indicates identical amino acid, while colon (:) and period (.) indicate conservation between amino acid groups of strongly and weakly similar properties, respectively. Sequence identity among isolates/strains is shown below the alignment.
