# Supplementary material for: Prevalence and Antimicrobial Resistance of Staphylococcus aureus and Coagulase-Negative Staphylococcus/Mammaliicoccus from Retail Ground Meat: Identification of Broad Genetic Diversity in Fosfomycin Resistance Gene fosB
Source: MDPI journal article supplement (doi:10.3390/pathogens11040469), 2022-04-14
Supplement: s1 [file s1]

**Table S1** Nucleotide sequence identity (%) of *fosB* among different staphylococcal species/clusters/subclusters

| Cluster                                   | <i>S. aureus</i> I |        |        |        | <i>S. warneri</i> |        |        |        | <i>S. saprophyticus</i> |        |        |        |        |        |        |        |        |        |        |        | <i>S. aureus</i> II |       |       |       | <i>S. epidermidis</i> | <i>S. lugdunensis</i> | <i>S. capitis</i> |       |       |       |       |       |       |       |       |       |       |       |       |       |       |
|-------------------------------------------|--------------------|--------|--------|--------|-------------------|--------|--------|--------|-------------------------|--------|--------|--------|--------|--------|--------|--------|--------|--------|--------|--------|---------------------|-------|-------|-------|-----------------------|-----------------------|-------------------|-------|-------|-------|-------|-------|-------|-------|-------|-------|-------|-------|-------|-------|-------|
| Subcluster (SC)                           |                    |        |        |        | 1                 | 2      |        |        | 3                       |        |        | 2      | 1      |        |        |        |        |        | 1      |        | 2                   |       |       |       | 2                     | 1                     |                   |       |       |       |       |       |       |       |       |       |       |       |       |       |       |
| Strain / isolate ID                       |                    |        |        |        |                   |        |        |        |                         |        |        |        |        |        |        |        |        |        |        |        |                     |       |       |       |                       |                       |                   |       |       |       |       |       |       |       |       |       |       |       |       |       |       |
| 1: <i>S. aureus</i> -SA1278_fosB6_        | 100.00             | 99.29  | 99.29  | 99.05  | 73.33             | 73.10  | 73.57  | 74.05  | 73.33                   | 73.33  | 74.05  | 73.57  | 74.05  | 73.81  | 73.57  | 74.05  | 73.81  | 75.24  | 74.29  | 73.81  | 73.10               | 76.19 | 78.33 | 69.29 | 69.52                 | 69.52                 | 70.71             | 70.48 | 64.05 | 67.62 | 67.38 | 70.71 | 70.95 | 70.71 | 72.55 | 71.60 | 71.90 | 72.08 | 72.32 | 72.32 | 72.32 |
| 2: <i>S. aureus</i> -SA0406_fosB4_        | 99.29              | 100.00 | 99.52  | 99.29  | 73.10             | 72.86  | 73.33  | 73.81  | 73.57                   | 73.57  | 74.29  | 73.81  | 74.29  | 74.05  | 73.81  | 74.29  | 74.05  | 75.24  | 74.52  | 74.05  | 73.33               | 76.19 | 78.33 | 69.05 | 69.29                 | 69.29                 | 70.71             | 70.48 | 64.29 | 67.14 | 66.90 | 70.71 | 70.95 | 70.71 | 72.79 | 71.84 | 71.67 | 71.84 | 72.08 | 72.08 | 72.08 |
| 3: <i>S. aureus</i> -au-HS166_fosB1_      | 99.29              | 99.52  | 100.00 | 99.76  | 73.57             | 73.33  | 73.81  | 74.29  | 73.57                   | 73.57  | 74.29  | 73.81  | 74.29  | 74.05  | 73.81  | 74.29  | 74.05  | 75.48  | 74.52  | 74.05  | 73.33               | 76.43 | 78.57 | 69.52 | 69.76                 | 69.76                 | 70.95             | 70.71 | 64.29 | 67.38 | 67.14 | 71.19 | 71.43 | 71.19 | 73.03 | 72.08 | 72.14 | 72.32 | 72.55 | 72.55 | 72.55 |
| 4: <i>S. aureus</i> -SA1280_fosB5_        | 99.05              | 99.29  | 99.76  | 100.00 | 73.81             | 73.57  | 74.05  | 74.52  | 73.81                   | 73.81  | 74.52  | 74.05  | 74.52  | 74.29  | 74.05  | 74.52  | 74.29  | 75.71  | 74.76  | 74.29  | 73.57               | 76.67 | 78.81 | 69.52 | 69.76                 | 69.76                 | 70.71             | 70.48 | 64.52 | 67.62 | 67.38 | 71.43 | 71.67 | 71.43 | 73.27 | 72.32 | 72.38 | 72.55 | 72.79 | 72.79 | 72.79 |
| 5: <i>S. pasteurii</i> -DSM10656          | 73.33              | 73.10  | 73.57  | 73.81  | 100.00            | 92.38  | 91.90  | 91.90  | 79.05                   | 79.05  | 80.48  | 78.33  | 79.76  | 79.76  | 79.76  | 79.76  | 79.52  | 80.48  | 79.76  | 78.81  | 80.24               | 80.95 | 81.19 | 67.14 | 67.14                 | 66.90                 | 70.24             | 70.48 | 66.19 | 67.86 | 67.62 | 70.00 | 70.24 | 70.00 | 67.54 | 67.54 | 69.29 | 69.21 | 69.45 | 69.45 | 69.69 |
| 6: <i>S. warneri</i> -C33-1               | 73.10              | 72.86  | 73.33  | 73.57  | 92.38             | 100.00 | 97.14  | 97.62  | 79.52                   | 79.52  | 79.76  | 78.10  | 79.29  | 79.52  | 79.29  | 79.29  | 79.05  | 79.76  | 80.24  | 77.62  | 78.81               | 79.76 | 80.48 | 66.43 | 66.43                 | 66.19                 | 69.52             | 70.24 | 66.67 | 67.14 | 66.90 | 71.19 | 70.95 | 71.19 | 68.26 | 68.26 | 69.05 | 68.97 | 69.21 | 69.21 | 69.45 |
| 7: <i>S. lugdunensis</i> -C47-3           | 73.57              | 73.33  | 73.81  | 74.05  | 91.90             | 97.14  | 100.00 | 99.52  | 79.76                   | 79.76  | 79.29  | 77.38  | 79.05  | 79.05  | 79.05  | 79.05  | 78.81  | 79.52  | 79.76  | 77.14  | 78.10               | 79.29 | 79.52 | 65.95 | 65.95                 | 65.71                 | 69.52             | 70.24 | 65.71 | 66.67 | 66.43 | 70.00 | 70.24 | 70.00 | 67.54 | 67.54 | 68.57 | 68.50 | 68.74 | 68.74 | 68.97 |
| 8: <i>S. warneri</i> -C63                 | 74.05              | 73.81  | 74.29  | 74.52  | 91.90             | 97.62  | 99.52  | 100.00 | 79.76                   | 79.76  | 79.29  | 77.38  | 79.05  | 79.29  | 79.05  | 79.05  | 78.81  | 79.52  | 79.76  | 77.14  | 78.10               | 79.29 | 79.52 | 65.95 | 65.95                 | 65.71                 | 69.52             | 70.24 | 66.19 | 66.90 | 66.67 | 70.48 | 70.71 | 70.48 | 68.02 | 68.02 | 69.05 | 68.97 | 69.21 | 69.21 | 69.45 |
| 9: <i>S. saprophyticus</i> -ATCC15305     | 73.33              | 73.57  | 73.57  | 73.81  | 79.05             | 79.52  | 79.76  | 79.76  | 100.00                  | 100.00 | 89.05  | 86.90  | 86.67  | 86.67  | 86.67  | 86.67  | 86.43  | 88.33  | 87.62  | 85.95  | 85.71               | 86.67 | 86.90 | 71.90 | 71.67                 | 71.43                 | 74.05             | 74.29 | 65.48 | 66.67 | 66.43 | 67.62 | 67.86 | 67.62 | 65.67 | 65.21 | 66.30 | 68.74 | 69.45 | 69.45 | 69.21 |
| 10: <i>S. saprophyticus</i> -FDAARGOS_355 | 73.33              | 73.57  | 73.57  | 73.81  | 79.05             | 79.52  | 79.76  | 79.76  | 100.00                  | 100.00 | 89.05  | 86.90  | 86.67  | 86.67  | 86.67  | 86.67  | 86.43  | 88.33  | 87.62  | 85.95  | 85.71               | 86.67 | 86.90 | 71.90 | 71.67                 | 71.43                 | 74.05             | 74.29 | 65.48 | 66.67 | 66.43 | 67.62 | 67.86 | 67.62 | 65.67 | 65.21 | 66.67 | 68.74 | 69.45 | 69.45 | 69.21 |
| 11: <i>S. saprophyticus</i> -C57-1        | 74.05              | 74.29  | 74.29  | 74.52  | 80.48             | 79.76  | 79.29  | 79.29  | 89.05                   | 89.05  | 100.00 | 87.86  | 89.76  | 89.29  | 89.29  | 89.29  | 89.05  | 89.52  | 88.33  | 88.10  | 89.76               | 90.00 | 88.57 | 70.95 | 70.95                 | 70.71                 | 74.29             | 74.76 | 65.00 | 67.14 | 66.90 | 69.29 | 69.52 | 69.29 | 67.78 | 67.78 | 70.71 | 70.88 | 71.36 | 71.36 | 71.12 |
| 12: <i>S. equorum</i> -KS1039             | 73.57              | 73.81  | 73.81  | 74.05  | 78.33             | 78.10  | 77.38  | 77.38  | 86.90                   | 86.90  | 87.86  | 100.00 | 89.76  | 89.29  | 89.29  | 89.29  | 89.05  | 88.10  | 90.48  | 89.05  | 90.24               | 90.71 | 89.05 | 70.24 | 70.24                 | 70.24                 | 74.29             | 74.76 | 66.90 | 66.43 | 66.19 | 69.76 | 69.52 | 69.76 | 67.06 | 66.59 | 69.52 | 69.69 | 70.17 | 70.17 | 69.93 |
| 13: <i>S. saprophyticus</i> -C55-2        | 74.05              | 74.29  | 74.29  | 74.52  | 79.76             | 79.29  | 79.05  | 79.05  | 86.67                   | 86.67  | 89.76  | 89.76  | 100.00 | 99.52  | 99.52  | 99.52  | 99.29  | 90.48  | 88.57  | 89.76  | 88.33               | 89.29 | 90.71 | 71.90 | 71.90                 | 71.90                 | 75.00             | 75.48 | 66.43 | 67.86 | 67.62 | 69.52 | 69.29 | 69.52 | 69.21 | 68.74 | 70.71 | 70.88 | 71.36 | 71.36 | 71.12 |
| 14: <i>S. saprophyticus</i> -M11-1        | 73.81              | 74.05  | 74.05  | 74.29  | 79.76             | 79.52  | 79.05  | 79.29  | 86.67                   | 86.67  | 89.29  | 89.29  | 99.52  | 100.00 | 99.52  | 99.52  | 99.29  | 90.00  | 88.10  | 89.29  | 87.86               | 88.81 | 90.24 | 71.90 | 71.90                 | 71.90                 | 75.00             | 75.48 | 66.19 | 68.33 | 68.10 | 69.29 | 69.05 | 69.29 | 69.45 | 68.97 | 70.95 | 71.12 | 71.60 | 71.60 | 71.36 |
| 15: <i>S. saprophyticus</i> -C44-2        | 73.57              | 73.81  | 73.81  | 74.05  | 79.76             | 79.29  | 79.05  | 79.05  | 86.67                   | 86.67  | 89.29  | 89.29  | 99.52  | 99.52  | 100.00 | 99.52  | 99.76  | 90.00  | 88.10  | 89.29  | 87.86               | 88.81 | 90.24 | 71.90 | 71.90                 | 71.90                 | 75.00             | 75.48 | 65.95 | 67.86 | 67.62 | 69.05 | 68.81 | 69.05 | 69.21 | 68.74 | 70.71 | 70.88 | 71.36 | 71.36 | 71.12 |
| 16: <i>S. saprophyticus</i> -UT1-035      | 74.05              | 74.29  | 74.29  | 74.52  | 79.76             | 79.29  | 79.05  | 79.05  | 86.67                   | 86.67  | 89.29  | 89.29  | 99.52  | 99.52  | 99.52  | 100.00 | 99.76  | 90.00  | 88.10  | 89.76  | 87.86               | 88.81 | 90.24 | 71.90 | 71.90                 | 71.90                 | 75.00             | 75.48 | 66.43 | 67.86 | 67.62 | 69.52 | 69.29 | 69.52 | 69.69 | 69.21 | 71.19 | 71.36 | 71.84 | 71.84 | 71.60 |
| 17: <i>S. saprophyticus</i> -FDAARGOS_137 | 73.81              | 74.05  | 74.05  | 74.29  | 79.52             | 79.05  | 78.81  | 78.81  | 86.43                   | 86.43  | 89.05  | 89.05  | 99.29  | 99.29  | 99.76  | 99.76  | 100.00 | 89.76  | 87.86  | 89.52  | 87.62               | 88.57 | 90.00 | 71.67 | 71.67                 | 71.67                 | 74.76             | 75.24 | 66.19 | 67.62 | 67.38 | 69.29 | 69.05 | 69.29 | 69.45 | 68.97 | 70.95 | 71.12 | 71.60 | 71.60 | 71.36 |
| 18: <i>S. cohnii</i> -ATCC29974           | 75.24              | 75.24  | 75.48  | 75.71  | 80.48             | 79.76  | 79.52  | 79.52  | 88.33                   | 88.33  | 89.52  | 88.10  | 90.48  | 90.00  | 90.00  | 90.00  | 89.76  | 100.00 | 89.76  | 90.48  | 90.00               | 91.19 | 90.71 | 71.90 | 72.38                 | 72.38                 | 73.33             | 74.05 | 65.71 | 67.62 | 67.38 | 69.76 | 70.00 | 69.76 | 69.69 | 69.21 | 69.29 | 69.93 | 70.41 | 70.41 | 70.17 |
| 19: <i>S. saprophyticus</i> -P18-2        | 74.29              | 74.52  | 74.52  | 74.76  | 79.76             | 80.24  | 79.76  | 79.76  | 87.62                   | 87.62  | 88.33  | 90.48  | 88.57  | 88.10  | 88.10  | 88.10  | 87.86  | 89.76  | 100.00 | 90.24  | 89.29               | 91.19 | 90.95 | 71.90 | 71.67                 | 71.67                 | 74.76             | 75.24 | 66.67 | 66.19 | 65.95 | 67.86 | 67.62 | 67.86 | 69.69 | 69.21 | 70.95 | 71.60 | 71.60 | 71.60 | 71.36 |
| 20: <i>S. saprophyticus</i> -FDAARGOS_336 | 73.81              | 74.05  | 74.05  | 74.29  | 78.81             | 77.62  | 77.14  | 77.14  | 85.95                   | 85.95  | 88.10  | 89.05  | 89.76  | 89.29  | 89.29  | 89.76  | 89.52  | 90.48  | 90.24  | 100.00 | 91.90               | 91.19 | 90.71 | 71.43 | 71.43                 | 71.43                 | 75.00             | 74.76 | 66.67 | 65.95 | 65.71 | 70.95 | 71.19 | 70.95 | 69.21 | 68.97 | 70.24 | 70.41 | 70.88 | 70.88 | 70.64 |
| 21: <i>S. xylosus</i> -ATCC29971          | 73.10              | 73.33  | 73.33  | 73.57  | 80.24             | 78.81  | 78.10  | 78.10  | 85.71                   | 85.71  | 89.76  | 90.24  | 88.33  | 87.86  | 87.86  | 87.86  | 87.62  | 90.00  | 89.29  | 91.90  | 100.00              | 91.43 | 88.10 | 71.19 | 70.71                 | 70.71                 | 72.86             | 73.10 | 65.95 | 65.00 | 64.76 | 70.48 | 70.24 | 70.48 | 67.54 | 67.30 | 70.24 | 69.93 | 70.41 | 70.41 | 70.17 |
| 22: <i>S. saprophyticus</i> -M17-3        | 76.19              | 76.19  | 76.43  | 76.67  | 80.95             | 79.76  | 79.29  | 79.29  | 86.67                   | 86.67  | 90.00  | 90.7   |        |        |        |        |        |        |        |        |                     |       |       |       |                       |                       |                   |       |       |       |       |       |       |       |       |       |       |       |       |       |       |
