# Supplementary material for: Prevalence and Antimicrobial Resistance of Staphylococcus aureus and Coagulase-Negative Staphylococcus/Mammaliicoccus from Retail Ground Meat: Identification of Broad Genetic Diversity in Fosfomycin Resistance Gene fosB
Source: MDPI journal article supplement (doi:10.3390/pathogens11040469), 2022-04-14
Supplement: s1 [file s1]

**Table S2 Primers to detect 6-TG biosynthesis cluster genes by PCR**

| Target gene | primer | Nucleotide sequence     | Product size |
|-------------|--------|-------------------------|--------------|
| <i>tgsB</i> | tgsB-1 | ATGGAAAGAGAAAAAGTTGC    | 698 bp       |
|             | tgsB-2 | AAAAGACTCCTTAATATTGG    |              |
| <i>tgsC</i> | tgsC-1 | GATAAATTAGACATATGTGA    | 560 bp       |
|             | tgsC-2 | CTATATTAGAATTAACCAAATG  |              |
| <i>tgsD</i> | tgsD-1 | GGTAGTGGCATTGCTAAATTTG  | 568 bp       |
|             | tgsD-2 | CATATTTGTTGCAAATGATACTC |              |

**Table S3 Primers used to detect *fosB* by PCR for different *Staphylococcus* species and *Enterococcus***

| Bacterial species       | Primer          | Nucleotide sequence         | Product size          |
|-------------------------|-----------------|-----------------------------|-----------------------|
| <i>S. aureus</i>        | SA-fosB-F1      | CATATATGCTTTTCAGTCAG        | 332 bp                |
|                         | SA-fosB-R1      | TGTAATTCTAGCTTATGACC        |                       |
| <i>S. capitis</i>       | Scapi-fosB-NF1  | TCGTAAATCAAGTAACGAAG        | 515 bp                |
|                         | Scapi-fosB-RF1  | GAAGTTAAATAGTATTTTAGAG      |                       |
| <i>S. caprae</i>        | Scaprae-fosB-F1 | CATGTTTGCTTTTCTGTAG         | 328 bp                |
|                         | Scaprae-fosB-R1 | ATTCTAATTTATGCCCATC         |                       |
| <i>S. epidermidis</i>   | Sepi-fosB-F1    | GTCATACTTGGATTGCACTG        | 219 bp                |
|                         | Sepi-fosB-F1    | ATTCAATTTTATGCCCATCC        |                       |
| <i>S. haemolyticus</i>  | Shaemo-fosB--F1 | GATATTTTAGGGGCTGACAT        | 293 bp                |
|                         | Shaemo-fosB--R1 | AAACTTCCTGTATGCAATTC        |                       |
| <i>S. lugdunensis</i>   | Slugd-fosB-F1   | TCTGTAGCTGATTTAGCGAC        | 309 bp                |
|                         | Slugd-fosB-R1   | TTTATGACCATCTGGATCTG        |                       |
| <i>S. pasteurii</i>     | Spaste-fosB-NF1 | ATGATTCAATCCGTAAATCAC       | 420 bp                |
|                         | Spaste-fosB-NR1 | CTATTCATAAAATTTTATATGAG     |                       |
| <i>S. saprophyticus</i> | C571-FB-5P1     | ATGATTCAATCTATAAATCAC       | 425 bp (+C571-FB-3P1) |
|                         | C571-FB-3P1     | CCTACTTATATATAAAATTTTCATATG |                       |
|                         | M173-FB3        | GATTCAATCTATAAACCACG        | 201 bp (+M173-FB4)    |
|                         | M173-FB4        | GCCATATGTGTATACGAGTA        |                       |
| <i>S. warneri</i>       | Swarn-fosB-F2   | TAAATAGGAGTAATTATATG        | 600 bp                |
|                         | Swarn-fosB-R2   | TATAAACTATTATTTACCTA        |                       |
| <i>E. faecium</i>       | Efm-fosB-F1     | TACAGAGATATTTTAGGGGC        | 309bp                 |
|                         | Efm-fosB-R1     | TCTATCTTCTAAACTTCCTG        |                       |

**Table S4 Primers used to amplify whole *fosB* ORF to determine its nucleotide sequence**

| Staphylococcal species                   | Primer         | Nucleotide sequence         | Product size             |
|------------------------------------------|----------------|-----------------------------|--------------------------|
| <i>S.saprophyticus</i>                   | S.sap-fosB-N4  | (+) TCTATTTTAGGAGTTTTTATATG | 1.5 kb (+M173-R1)        |
|                                          | M173-R1        | (-) ATGCCATATGTGTATACGAG    |                          |
|                                          | M173-FB1       | (+) CA CAATAAGCGA GCTGTATC  | 1.1 kb (+M173-FB2)       |
|                                          | M173-FB2       | (-) CTCTGTACTGCATCGAGAAATG  |                          |
|                                          | M173-FB7       | (-)TCGCTCTGTGTTGCATCGAT     | 1 kb (+M173-FB1)         |
|                                          | C571-FB-UPF1   | (+) ATG GAGAAAAAAT TGAAGTGA | 1.5 kb (+C571-FB-DW1)    |
|                                          | C571-FB-DW1    | (-) CATTGTAAAAAACTTCCCCA    |                          |
|                                          | P182-5'-F1     | (+) TGGGGTGAATTAACATATGAG   | 1 kb (+P182+5'-R1)       |
|                                          | P182-5'-R1     | (-) CATCTTTATAGAAAGCAATAG   |                          |
| <i>S.warneri</i> , <i>S. pasteurii</i> , | Swarn-fosB-F2  | (+) TAAATAGGAGTAATTATATG    | 600 bp (+Swarn-fosB-R2)  |
| <i>S. lugdunensis</i>                    | Swarn-fosB-R2  | (-) TATAAACTATTATTACCTA     |                          |
| <i>S.capitis</i>                         | Scapi-fosB-NF1 | (+) TCGTAAATCAAGTAACGAAG    | 515 bp (+Scapi-fosB-nR1) |
|                                          | Scapi-fosB-NR1 | (-) GAAGTTAAATAGTATTTTAGAG  |                          |

**Table S5 Genbank accession numbers of *fosB* gene identified in this study**

| Isolate ID | Specimen (ground meat) | Species                 | GenBank accession no. |
|------------|------------------------|-------------------------|-----------------------|
| C47-3      | chicken                | <i>S. lugdunensis</i>   | OL964368              |
| C34-2      | chicken                | <i>S. pasteurii</i>     | OL964369              |
| C1         | chicken                | <i>S. capitis</i>       | OL964370              |
| C2         | chicken                | <i>S. capitis</i>       | OL964371              |
| C46-2      | chicken                | <i>S. capitis</i>       | OL964372              |
| C6         | chicken                | <i>S. warneri</i>       | OL964373              |
| C33-1      | chicken                | <i>S. warneri</i>       | OL964374              |
| C39-2      | chicken                | <i>S. saprophyticus</i> | OL964375              |
| P6-1       | pork                   | <i>S. saprophyticus</i> | OL964376              |
| M25-2      | pork and beef          | <i>S. saprophyticus</i> | OL964377              |
| C55-2      | chicken                | <i>S. saprophyticus</i> | OL964378              |
| C60-1      | chicken                | <i>S. saprophyticus</i> | OL964379              |
| C44-2      | chicken                | <i>S. saprophyticus</i> | OL964380              |
| C57-1      | chicken                | <i>S. saprophyticus</i> | OL964381              |
| P18-2      | pork                   | <i>S. saprophyticus</i> | OL964382              |
| M17-3      | pork and beef          | <i>S. saprophyticus</i> | OL964383              |
